1 **Title:** Online, Interactive Tutorials Provide Effective Instruction in Science Process  
2 Skills

3 **Manuscript Type:** Article

4 **Number of Characters:** 48,477 characters (including spaces)

5 **Running Title:** Interactive Science Skills Tutorials

6 **Authors:** Kramer, Maxwell; Olson, Dalay; Walker, J.D. (MK and DO contributed  
7 equally)

8 **Affiliations:** *MK and DO:* Department of Biology Teaching and Learning, University  
9 of Minnesota, Minneapolis, MN, 55455; *JDW:* The Center for Educational  
10 Innovation, University of Minnesota, 55414.

11 **Keywords:** science process skills, multimedia instruction, undergraduate  
12 education, active learning

13 **Corresponding author:** Maxwell Kramer; [kram0247@umn.edu](mailto:kram0247@umn.edu); 5-220 Moos  
14 Tower, 515 Delaware Street SE, Minneapolis, MN 55455; (503) 307-2532 (mobile  
15 phone); 612-625-2532 (department phone); (612) 626-7823 (fax)

16

17 **Abstract** (200 words):

18 Explicit emphasis on teaching science process skills leads to both gains in the skills themselves and,  
19 strikingly, deeper understanding of content. Here, we created and tested a series of online, interactive  
20 tutorials with the goal of helping undergraduate students develop science process skills. We designed  
21 the tutorials in accordance with evidence-based multimedia design principles and student feedback  
22 from usability testing. We then tested the efficacy of the tutorials in an introductory undergraduate  
23 biology class. Based on a multivariate ordinary least squares regression model, students that received  
24 the tutorials are predicted to score 0.824 points higher on a 15 point science process skill assessment  
25 than their peers that received traditional textbook instruction on the same topic. This moderate but  
26 significant impact indicates that well designed online tutorials can be more effective than traditional  
27 ways of teaching science process skills to undergraduate students. We also found trends that suggest  
28 the tutorials are especially effective for non-native English speaking students. However, due to a limited  
29 sample size, we were unable to confirm that these trends occurred due to more than just variation in  
30 the sampled student group.

## 31 Introduction

### 32 Science process skills are an important component of undergraduate biology curricula.

33 A primary goal of undergraduate biology education is to have students develop the ability to think like a  
34 scientist. That is, students must develop the ability to ask and answer meaningful biological questions,  
35 the core of scientific inquiry. To achieve this goal, students need to master an underlying set of skills  
36 including the ability to ask a testable question, propose a hypothesis, design an experiment, analyze  
37 data, draw conclusions from evidence and communicate findings. We refer to these skills as *science*  
38 *process skills*. Recent reports by the American Association for the Advancement of Science [AAAS] (2009)  
39 and other biology education leaders (Wright & Klymkowsky, 2005; Krajcik & Sutherland, 2010)  
40 emphasize teaching these skills as a key goal in improving undergraduate education. Faculty also  
41 overwhelmingly value these skills in their students, but traditionally neglect to include them in course  
42 design due to a fear of losing time devoted to important subject content (Coil *et al.*, 2010). Here, we  
43 offer an alternative approach to incorporating science process skills into course curriculum. We created  
44 a series of interactive online tutorials that explicitly teach science process skills and supplement  
45 classroom learning with minimal added effort from instructors.

46 Recent attempts at re-designing undergraduate biology courses show that placing an explicit  
47 emphasis on science process skills leads to both gains in the skills themselves and, strikingly, greater  
48 retention of subject content. Students who participated in a supplemental course at the University of  
49 Washington that taught science process skills and other aspects of scientific culture earned higher  
50 grades in introductory biology classes than their peers who did not participate in the course (Dirks &  
51 Cunningham, 2006; Buchwitz *et al.*, 2012). Further supporting the benefits of learning science process  
52 skills, students' scores on a science process skills assessment taken after the supplemental course  
53 correlated with their introductory biology course grades. The connection between science process skills  
54 and overall course grade underscores the impact of explicit instruction in science process skills. In  
55 another example, students at Brigham Young University participated in a re-designed cell biology course  
56 that placed explicit emphasis on data analysis, interpretation and communication. These students  
57 showed improvement in both data analysis and conceptual problems during the course (Kitchen *et al.*,  
58 2003). They also scored higher than students in the traditional content-focused cell biology course on  
59 both analysis and recall problems. Other instructors have focused on using primary literature to  
60 emphasize critical thinking and science process skills in redesigned courses. The CREATE method,  
61 developed at the City University of New York, teaches the nature of science through a series of primary  
62 research papers produced by a single research group covering a specific topic (Hoskins *et al.*, 2007).  
63 Students use active learning approaches to apply science process skills like hypothesis generation,  
64 experimental design, data analysis and scientific communication. This approach has yielded gains in  
65 critical thinking, gains in experimental design, and improved student attitudes about science in a broad  
66 range of postsecondary settings, from community colleges to graduate programs (Hoskins *et al.*, 2011;  
67 Gottesman & Hoskins, 2013; Stevens & Hoskins, 2014; Kenyon *et al.*, 2016). While the well-defined  
68 CREATE method has proven highly effective in most implementations studied, some instances show no  
69 extra gains compared to other active, literature-focused pedagogies (Segura-Totten & Dalman, 2013) In  
70 each of these examples, explicit instruction in science process skills led to greater facility with those  
71 skills and better content learning in the subject area. Taken together, these results illustrate a clear  
72 value in emphasizing science process skills for undergraduates.

### 73 **Barriers to teaching science process skills**

74 While the value of teaching science process skills becomes clearer every year, significant barriers still  
75 prevent their incorporation into undergraduate curricula. Chief among the barriers is the time  
76 commitment required for instruction. As any instructor knows well, time with students is limited and  
77 instructors must allocate class time for maximum student benefit. This leads to the familiar debate  
78 between covering as much subject material as possible versus a “more is less” approach that focuses on  
79 skill development and inquiry while covering a narrower range of topics. Up to this point, most  
80 incorporation of science process skills has focused on course-wide redesigns and long-term instruction,  
81 as described above. These large-scale changes require significant investment of the instructor’s time and  
82 re-allocation of class time. Other attempts at emphasizing science process skills have focused on their  
83 integration into laboratory and research experiences, an option not available to all courses and  
84 instructors (DeBurman, 2002; Shi *et al.*, 2011; Brownell *et al.*, 2015; Woodham *et al.*, 2016). Short of  
85 these large changes, could smaller scale incorporation of science process skills instruction prove useful  
86 to student learning? Little research has evaluated the effect of limited, stand-alone instruction in science  
87 process skills.

88

### 89 **Deficiencies of textbook-based instruction**

90 As often as not, students’ only exposure to science process skills comes as an assigned reading in the  
91 first chapter of a science textbook. While noble in their intent, these readings often fail to engage  
92 students. Students struggle to synthesize the large amounts of information presented in a textbook into  
93 an organized framework. This occurs because the amount of processing required by the textbook  
94 reading exceeds the capacity of students’ working memory, the amount of information a person is  
95 capable of processing at a given time. In psychology terminology, this problem with textbook-based  
96 learning is called cognitive overload (Mayer & Moreno, 2003). Static text and layout require readers to  
97 devote a large portion of their cognitive load to aspects of the textbook other than the intended  
98 content. It is common to find topics covered in one section referencing diagrams found on different  
99 pages, forcing students to flip back-and-forth in order to match the text with its graphical  
100 representation. The process of moving from page to page requires that the reader split their attention  
101 and use what limited working memory they have to synthesize information found in two distinct areas.  
102 Additionally, textbooks often overload students with too much information, making it difficult for them  
103 to identify and focus on the information worth remembering. While high cognitive load is a common  
104 problem for textbooks, not all textbooks are poorly designed. If designed correctly, textbooks can be as  
105 effective at teaching students as alternative multimedia. Unfortunately, when it comes to science  
106 process skills, this is more often the exception than the rule.

107

### 108 **Benefits of interactive digital instruction**

109 Many students opt out of reading the textbook and instead rely only on in-class lectures to help them  
110 learn important topics covered in the course. How can instructor convince their students of the value of  
111 pre-class learning? Resistance to learning outside of the classroom is being met with new ways of  
112 engaging students. Online, multimedia-based learning is improving education by engaging students

113 through interactive multisensory learning. Harnessing the power of audio, visuals, text, animation and  
114 user interactions, multimedia design capitalizes on a variety of ways to deliver information. Students are  
115 able to receive and process information through two primary channels: audio and visual. By  
116 simultaneously tapping into both channels students are capable of processing larger amounts of  
117 information resulting in increased retention. By using this medium, instructors can effectively reduce  
118 cognitive load for their students and enable quicker, better-retained learning (Mayer & Moreno, 2003;  
119 Evans & Gibbons, 2007; Mayer, 2008; Domagk *et al.*, 2010). A multitude of examples show that online  
120 multimedia learning not only helps students to improve their understanding of the concepts presented,  
121 but also allows them to integrate new concepts with their existing knowledge base (Carpi, 2001; Carpi &  
122 Mikhailova, 2003; McClean *et al.*, 2005; Silver & Nickel, 2005; Chudler & Bergsman, 2014; Goff *et al.*,  
123 2017).

124

### 125 **Interactive digital modules created to teach science process skills**

126 This paper will outline best practices for creating useful and engaging multimedia based tutorials that  
127 provide students with an alternative method of learning key material outside of the classroom. Using  
128 these principles, we created a series of seven interactive digital modules, each addressing a different  
129 science process skill and incorporated them into in a large enrollment introductory biology course. We  
130 then assessed the tutorials' effect on students' ability to apply those skills compared to students that  
131 received only traditional textbook-based instruction. Although we tailored our design strategy to online,  
132 multimedia-based learning, instructors can, and should, be able to apply many of these same principles  
133 to lecture based design as well.

134

## 135 **Tutorial Design**

### 136 **Tutorial Design Methods**

137 To create online tutorials, we used Articulate Storyline 2 software (Articulate Global, Inc.), with  
138 VideoScribe software (Sparkol Limited, Bristol UK) to create animated whiteboard style videos. All  
139 tutorial modules were administered as SCORM 2004 packages via Moodle learning management system,  
140 version 3.0.

141

### 142 **Multimedia Design Principles**

143 Our online, science process tutorial was broken up into seven modules outlining the different steps  
144 within the scientific process. Although we understand that science does not always progress linearly, we  
145 designed these tutorials to be completed in a sequential order. Following the principle of backwards  
146 design (Wiggins & McTighe, 2005), we first established a concrete set of learning objectives for each of  
147 the seven modules (Supplemental Material). Each module covered two to five learning objectives guided  
148 by Bloom's Taxonomy principles in order to promote higher-level, critical thinking and analytical skills  
149 (Bloom *et al.*, 1956; Crowe *et al.*, 2008).

150 Once completed, these objectives became the roadmap that guided both the content as well as the  
151 assessments. When choosing the format for the tutorial, we felt it important that our students  
152 experience the process of scientific discovery firsthand. For many years, educational research has  
153 supported the use of stories and case studies to teach and make a personal connection with science  
154 students (Martin & Brouwer, 1991). Therefore, our science process tutorial follows the storyline of two  
155 Nobel laureates, Dr. Barry Marshall and Dr. Robin Warren and their quest to discover the underlying  
156 causes of ulcers. From reading primary literature to establishing experiments to analyzing and  
157 presenting data, the goal of the online tutorial was to simulate the process of science through the lens  
158 of two experienced researchers. Importantly, our online platform offered students an opportunity to  
159 learn through interactive engagement rather than passive reading of text.

160 Having selected learning objectives and the overarching narrative structure for the tutorial, we next  
161 turned to designing how the students would interact with the tutorial. A growing body of evidence  
162 suggests that multimedia platforms, if properly designed, are effective tools for learning scientific  
163 material. For each of the seven individual modules, we followed evidence-based principles of  
164 multimedia design outlined, in large part, by Richard Mayer with special attention placed on the  
165 coherency and redundancy principles (Mayer, 2008) (Supplemental Materials).

166 The coherency principle suggests limiting the use of visuals that do not support the overall learning  
167 objectives of the project. Every item occupying the learning space increases cognitive load on the  
168 learner. Therefore, to maximize learning gains and limit cognitive overload we carefully selected only  
169 diagrams and text that support the learning outcomes of the scene. Close adherence to the coherency  
170 principle was especially important for this tutorial because of the limited screen space. For each visual  
171 scene presented to students, we were careful to limit written text. This approach especially relied on  
172 narrated scenes, so that audible narration was not repeated by verbatim text, a concept that closely  
173 aligns with the redundancy principle.

174 The redundancy principle strives to limit the use of printed text for a *narrated* graphic. In other words,  
175 narration should describe an image rather than re-reading words on a screen. Simultaneous  
176 presentation of words and narration can overload the user's working memory, making it harder to learn  
177 the topic at hand. Instead, research suggests that it is better to replace the words with an image that  
178 displays the narrated process .

179 Finally, to reduce cognitive load, we created a consistent user experience throughout the tutorial  
180 (Mayer, 2008; Blummer & Kritskaya, 2009). A consistent navigation interface with clearly labelled  
181 buttons allowed student to focus more of their mental capacity on the content presented. We also  
182 included repeated prompts and signals that communicate to students what information is most  
183 important, when a section is complete, what resources are available and when they are required to  
184 make a decision. Approaches as simple as highlighting key words and using a consistent "NEXT" button  
185 allow students to reduce extraneous processing.

186

## 187 **Tutorial Audience**

188 We designed our tutorials for undergraduate students with little or no background in the biological  
189 sciences. Target populations included students majoring in biology, other science majors and students

190 majoring in non-science subjects. Because the tutorials address fundamental science process skills  
191 through the lens of biology, they are appropriate for this broad audience. We also were interested in  
192 designing the tutorials to aid students that are non-native English speaking (NNES) students. Interactive  
193 and online learning methods can be especially useful for NNES students because they allow students to  
194 control the pace of their learning, immediately repeat difficult material, and use visual representations  
195 that do not depend on written text. Simulations and learning games are especially effective for NNES  
196 students (Abdel, 2002). As such, we recognized the potential our tutorials hold for NNES students and  
197 emphasized these elements in our tutorials to make them maximally useful.

198

## 199 **Tutorial Format**

200 In agreement with these design principles, each module followed a similar layout and students quickly  
201 became familiar with the general types of slides: the introductory slide, the challenge questions and the  
202 summary slides. The introductory slide was the first slide in each module (Figure 1A). On each  
203 introductory slide, students watched a brief video that summarized previous modules and outlined  
204 upcoming learning objectives. In accordance with the redundancy principle, we used whiteboard-style  
205 animations to build the introductory videos (Türkay, 2016). In the videos, drawings appeared as the  
206 narrator describes them, an approach that has been shown to increase student engagement (Guo *et al.*,  
207 2014) and that allowed the viewer to take in related information through both the auditory and visual  
208 channels simultaneously. Capitalizing on the use of both auditory and visual channels limited cognitive  
209 overload and freed the learner to process and store larger amounts of information.

210 Following the introductory whiteboard video, an onscreen character greeted the student and introduced  
211 the specific activities for that module. Personalizing interactions between an onscreen character and the  
212 learner created a sense teamwork. The onscreen character in each module served to guide the storyline,  
213 provided feedback, and prompted the students to think deeply about the learned material (Figure 1B-C).  
214 In the module “Design an Experiment,” students were asked to help the researchers develop an  
215 experimental outline for the project. As the students progressed through the module, they learned the  
216 importance of selecting a model system, assigning proper treatment and control groups, and creating a  
217 protocol. Challenge questions posed by the onscreen character during each of these steps pushed  
218 students to think critically about typical problems faced at each step of the scientific process.

219 The tutorials were designed so that when students made choices or answered questions, they reflected  
220 on why they chose their specific option and why the other options were better, worse or totally wrong.  
221 For example, when selecting the treatment group for their experiments, students chose from four  
222 different treatment options. In this scenario, students must select *and* justify the use of their selected  
223 treatment. If students selected an incorrect treatment, they received specific feedback that helped  
224 guide them to the correct answer (Figure 1C). This feature of the tutorials comports with research  
225 indicating that explanatory or informed-tutoring feedback, which provides context and explanations for  
226 why an incorrect choice is incorrect and a correct one is correct, is more helpful in the learning process  
227 than feedback that is merely corrective (Moreno, 2004; Narciss, 2004).

228 Lastly, once the student selected the correct answer, we used a consistent format to summarize the  
229 question and responses. This interactive slide let students review their correct answer and each of the  
230 incorrect answers, including explanations about how each answer fit with the larger concept. In pilot

231 studies, students found the guided feedback very useful for helping them break down complicated  
232 material into single units of information. Additionally, we found that asking students to justify their  
233 selection forced students to think critically about the question at hand instead of randomly selecting an  
234 answer.

235 Students are better able to engage with multimedia tutorials when they can track their progress and see  
236 how close to finishing they are. Some tutorials display the percent complete or the total number of  
237 slides. For our tutorial, we created a test tube graphic to represent progress in the tutorial. The test-  
238 tube also served a second purpose, to show students the learning objectives for that module. As  
239 students complete learning objectives, the test tube fills up (Figure 1D). At the end of the tutorial, the  
240 student finishes with a full test tube that displays all of the learning objectives (Figure 1E). This visual  
241 tracking method also allows students to “collect” test tubes for all seven modules in the tutorial,  
242 creating a game-like incentive that engages students (Figure 1F). Based on student feedback, students  
243 appreciated the ability to track their progress through the tutorial.

244 As mentioned, the test tubes served a second purpose as a way for students to explicitly see the  
245 learning objectives for the current module. Upon completing a module, students saw the full test tube  
246 with each learning objective filled in (Figure 1E). Each learning objective was as a clickable item that led  
247 to a small review activity on that topic. Along with this end of module review, students were always able  
248 to review test tubes and learning objectives from previously completed modules by clicking on a  
249 consistent icon in the corner of the tutorial screen. This approach requires that students actively seek  
250 out necessary information, referred to as “pulling” information. This design strategy was repeated  
251 throughout the tutorial as a way to further engage students and give them a sense of control as they  
252 work through the tutorial. By using the test tube format, the modules clearly articulate learning  
253 objectives and offer a convenient way to revisit previous material.

## 254 **Usability testing**

255 After the initial design, we refined our tutorials based on usability testing. Because students experienced  
256 the tutorials on their own time and without direct input from the instructor, it was imperative that the  
257 tutorials were easy to use, engaging, accessible to students of all abilities, and met our intended learning  
258 objectives. To reach these goals, we collaborated with the University of Minnesota Usability Lab. The  
259 usability lab provides a physical space to observe a person using a product or design in real time and a  
260 process to help improve the effectiveness and accessibility of that product based on those observations.  
261 During this process, we met with a usability expert from the lab, determined testing goals, conducted  
262 focus groups with undergraduate students, evaluated the results, and decided on specific improvements  
263 to the tutorials that addressed identified problems. We chose to focus on improving navigation,  
264 optimizing information placement, and determining whether tutorial content was properly challenging  
265 for undergraduate students. Students selected for participation were observed as they attempted to  
266 complete the “Design an Experiment” tutorial module, immediately followed by a debriefing interview  
267 with the usability expert. During the testing session, we directly observed students via a one-way mirror,  
268 their computer screen via simulcast, and their eye movements via eye-tracker camera and software. We  
269 tested tutorials in this way with six undergraduate students, including both biology majors and non-  
270 majors, and native English speakers and non-native English speakers.

271 During usability testing, we found that students were most engaged by concise delivery of information  
272 with emphasis placed on key concepts (e.g. bold, italics, or color), extremely consistent visual markers



273 for navigation, and immediate feedback for wrong answers to challenge questions. As expected, the  
274 level of difficulty, as measured by in tutorial assessment questions, was higher for students who were  
275 majoring in subjects outside of the sciences. Lastly, we found that distinct aspects of the tutorials  
276 engaged non-native English speakers. Consistent layout and visual design were important for easy  
277 navigation. We suspect that this design allowed students to spend less cognitive energy decoding the  
278 instructions and navigation, and to focus more on absorbing content from the tutorials. Along similar  
279 lines, non-native English speakers also specifically appreciated repeated presentation of key ideas and  
280 optional chances to review those important concepts. We incorporated all of these observations into  
281 the design strategy for the final version of the tutorials (see Supplemental Material for specific  
282 feedback).

283

## 284 **Research study**

### 285 **Design**

286 To investigate the effectiveness of our online science process skills tutorials, we conducted a quasi-  
287 experimental study in a large format introductory biology course for students majoring outside biology  
288 in spring of 2017 at the University of Minnesota, a large public research institution in the Midwest of the  
289 United States (Figure 2). Without prior knowledge of this study, students enrolled in one of two sections,  
290 each with the same instructor. One section was assigned the tutorials as an out-of-class activity to  
291 supplement textbook reading over the first two weeks of the course, the “online tutorial” group  
292 (n=118). Student completion of the tutorials was high: 93% of enrolled students completed at least  
293 three out of five tutorials and 88% of enrolled students completed all five tutorials. The other section  
294 was assigned only out-of-class textbook reading covering similar subject material over the same two  
295 weeks, the “textbook reading” group (n=118). For reasons of fairness, students in the textbook reading  
296 group were given access to the online tutorials following the experimental period and assessment.  
297 Students were incentivized to complete the tutorials with a small amount of homework credit (low  
298 stakes). The University of Minnesota Institutional Review Board deemed this study exempt from review  
299 (Study Number: 1612E01861).

300

### 301 **Measures**

302 While recent studies in undergraduate education have focused on ways to improve scientific literacy  
303 and proficiency, the ability to test the effectiveness of these interventions is limited. To date, very few  
304 formative assessments designed to gauge science process skills have been validated, and those that  
305 have, are geared towards assessing K-12 students. Therefore, due to the lack of validated assessments,  
306 we chose to modify a well-accepted science process skills assessment tool known as the Integrated  
307 Process Skills Test, or TIPS II (Burns *et al.*, 1985). Modified versions of TIPS II have been successfully used  
308 to assess science process skills in high school seniors, a population of students very similar to our own  
309 (Kazeni, 2005). Rather than design and validate a new assessment tool we chose to select questions  
310 from TIPS II for our assessment.

311 The fifteen-question assessment was designed to assess five different categories of science process skills  
312 including graphing and interpreting data, identifying variables, stating hypotheses and selecting

313 operational definitions (Supplemental Material). To populate each category in our assessment we  
314 selected only the questions from TIPS II with the highest item discrimination index (as reported in  
315 Kazeni, 2005), a statistical measure that distinguishes between high performing and low performing  
316 examinees for a given assessment. The average item discrimination index of questions selected from  
317 TIPS II was 0.4, well above the acceptable range ( $>0.3$ ; Bass *et al.*, 2016). Student scores on these fifteen  
318 TIPS II items were averaged to create the main outcome variable in this study.

319 The ability to apply science process skills was assessed in both the online tutorial and textbook reading  
320 groups at the same point in the semester, after instruction was complete, using our modified TIPS II test.  
321 Student participation in the assessment was high for both groups: 98/118 for the online tutorial group  
322 and 112/118 for the textbook reading group.

### 323 **Data**

324 The total pool of study participants was 54.3% female and 45.7% male, with a median age of 20.34  
325 years. The respondents were 0.5% American Indian, 8.7% Asian, 6.6% black, 2.9% Hispanic, 15.8%  
326 international, and 65.3% white. They were 3.6% first-year students, 40.6% sophomores, 32.0% juniors,  
327 and 23.9% seniors, and 18.3% were listed as non-native English speaking (NNES) students. 74.2% of  
328 participants were non-science majors.

329 Because participants were not randomly assigned to the online tutorial and textbook reading groups, it  
330 was important to establish comparability of the two groups on the available exogenous variables, which  
331 included aptitude variables (composite ACT score, GPA) and demographic variables (ethnicity, sex, age,  
332 major, NNES status). We ran appropriate group comparison tests and determined that the two groups of  
333 participants were statistically equivalent on all aptitude and demographic variables, with the exception  
334 of age: the mean age in the online tutorial group was slightly higher than the mean age in the textbook  
335 reading group (20.55 vs 19.88,  $p = .008$ ).

### 336 **Analysis and Results**

337 We constructed a multivariate ordinary least squares regression model to predict participants'  
338 performance on our outcome variable of interest, namely score on the modified TIPS II test. For this  
339 model, casewise diagnostics were generated and examined to locate outliers in the data set, defined as  
340 cases with standardized residuals greater than 3.3. This procedure revealed three outliers for the  
341 dependent variable. On inspection, these cases were not otherwise anomalous, so they were retained in  
342 the data set. Variance inflation factor (VIF) statistics were also generated to check for multicollinearity  
343 among the predictor variables. In no case was the VIF statistic greater than 1.135, far from the common  
344 cut-off of 4, so multicollinearity did not appear to be a problem in the data set. The Durbin-Watson  
345 statistic of 2.346 indicated very little auto-collinearity in the data.

346 The model included just three predictor variables (GPA, NNES status, and treatment group); no other  
347 demographic variables were significantly related to TIPS II score. The model was highly significant ( $p <$   
348  $.001$ ) and accounted for a small-to-moderate amount of the variation in TIPS II score with an  $R^2$  value of  
349  $.403$ , adjusted  $R^2 = .140$ .

350 The covariate GPA was significantly related at the  $p < .05$  level to TIPS II scores ( $t = 2.799$ ,  $p = .006$ ), as  
351 was the main treatment of interest, being in the online tutorial group ( $t = 2.600$ ,  $p = .010$ ). The predictor

352 variable representing NNES status was negatively associated with TIPS II scores, but it was not  
353 statistically significant ( $t = -1.164$ ,  $p = .246$ ).

354 Given the results displayed in Table 1, we can conclude that for each unit increase in a student's GPA,  
355 we can expect more than a 1-point increase in that student's TIPS II score. Similarly, being in the online  
356 tutorial group was associated with a 0.824 point increase in a student's TIPS II score, while holding other  
357 variables in the model constant. The pooled standard deviation for the TIPS II score variable was 1.99, so  
358 the effect size for GPA was moderate to large (almost 60% of a standard deviation), while the effect size  
359 for being in the online tutorial group was moderate (over 40% of a standard deviation).

360

### 361 **Results for NNES Students**

362 One sub-population of interest in this study was the group of students identified as non-native English  
363 speaking (NNES) students, so additional analyses were performed to examine the effects of the online  
364 tutorials on this group. There were some indications in the data that the online tutorials may have  
365 benefited NNES students to a greater degree than they benefited students who were native speakers of  
366 English, but low subgroup N rendered these indications unclear.

367 First, we asked whether being in the online tutorial group improved the TIPS II scores of NNES students  
368 more than it improved the scores of other students. The answer was, nominally, yes (Figure 3). Among  
369 native speakers, being in the online tutorial group helped (mean difference 0.731,  $p = .025$ ). However,  
370 among NNES students, being in the experimental group helped *more* (mean difference 1.308,  $p = .311$ ).  
371 The latter difference is over  $\frac{1}{2}$  of a standard deviation and is much larger than the difference between  
372 the scores of tutorial and textbook native English speakers, but it does not test significant because of  
373 low N in the NNES group (20 total).

374

375 Second, we noted that NNES students had average TIPS II scores that were significantly lower than the  
376 scores of native English speakers (10.15 vs 11.23,  $p = .030$ ). So we asked whether being in the online  
377 tutorial group helped NNES students to *close the gap* between themselves and native speakers. Again,  
378 the answer was, nominally, yes (Figure 4). The difference in average TIPS scores between native  
379 speakers and NNES students was 1.21 points in the textbook reading group ( $p = .101$ ), while in the  
380 online tutorial group the difference was just about half of that, 0.633 points ( $p = .255$ ).

381

### 382 **Discussion**

383 We created a series of online, interactive tutorials with the goal of helping undergraduate students  
384 develop science process skills. We designed the tutorials in accordance with evidence-based multimedia  
385 design principles and student feedback from usability testing. Based on a multivariate ordinary least  
386 squares regression model, students who received the tutorials are predicted to score 0.824 points  
387 higher on a 15-point science process skill assessment than their peers that received traditional textbook  
388 instruction on the same topic. This moderate but significant impact indicates that well designed online  
389 tutorials can be more effective than traditional ways of teaching science process skills to undergraduate

390 students. We also found trends that suggest the tutorials are especially effective for NNES students.  
391 However, due to a limited sample size, we were unable to confirm that these trends occurred due more  
392 than just variation in the sampled student group.

393

#### 394 **Strategies for student engagement**

395 A preponderance of evidence shows that active learning improves student learning compared to  
396 traditional lecture approaches (Freeman *et al.*, 2014). Here, we show that even on a very limited scale, a  
397 switch from traditional textbook reading to include a more active approach results in improved learning.  
398 To achieve this, we designed the tutorials to maximize interaction and engage students in multiple ways  
399 in our tutorials. First, the nature of the multimedia-driven, interactive format increases interactivity  
400 compared to textbook reading. While completing the tutorial, students are required to make decisions  
401 and those decisions shape how the rest of the tutorial proceeds. Multiple sensory channels are engaged  
402 in complimentary ways when students see images, hear narration and use computer interfaces to  
403 interact with the virtual environment. Each of these features creates opportunities for student  
404 engagement. While not every aspect might engage a particular student, the multiple levels of  
405 engagement increase the likelihood that one of those elements will grab and keep a student's attention  
406 during the tutorial.

407 We also chose to use a continued narrative across the modules in the tutorial to create a human  
408 connection with students. Our storyline focused on the connection between stomach ulcers and the  
409 bacteria *H. pylori* and the story of how two scientists, Robin Warren and Barry Marshall made that  
410 discovery in the 1980s. We used familiar settings, like a doctor's office and library, specific characters,  
411 and a medical mystery to create personal connections with students. We suspect that by connecting the  
412 scientific method to a human story, students were able to engage more quickly and deeply with the  
413 presented skills. While students appreciated the story, it was unclear whether they preferred a more  
414 cartoonish or realistic presentation style. Casual feedback from students covered all perspectives from  
415 appreciation to distaste for our animation-based style, but NNES students clearly favored the cartoon  
416 style. This is consistent with other research that shows schematics are more effective at teaching  
417 biological mechanism than realistic images (Scheiter *et al.*, 2009). Comparing different levels of realism  
418 would make an area excellent future investigation.

419 Lastly, we maximized student engagement by offering frequent, specific feedback and opportunity for  
420 reflection. We offered feedback in real time as students made choices, after challenge questions and at  
421 the end of each module. We found that students appreciated a consistent format for feedback and were  
422 able to focus on their thought process and reasoning when presented with a standardized feedback  
423 interaction. We also found that feedback needed to be specific. During usability testing, we observed  
424 that when the tutorial provided targeted feedback explaining why each of wrong answers were wrong,  
425 students stayed more engaged and were more comfortable with the presented concepts at the end of  
426 the tutorial. Lastly, we gave students a chance to revisit and modify their ideas. This was especially  
427 evident in the "Propose a Hypothesis" module where the tutorial guides students to revise their  
428 hypothesis to make it more scientifically sound. These types of interactions provide both engagement  
429 and opportunity for formative assessment by the student.

430

## 431 **Potential Uses for Tutorials**

432 In this study, we used our online tutorials as an out-of-class assignment, but they could be employed in  
433 a variety of situations. We also created the tutorials with the intention that both the narrative content  
434 and the learning goals associated with science process skills could be adapted to suit individual  
435 instructor's needs. In fact, we tweaked several learning objectives before our study to better align the  
436 tutorial with the instructor's other activities and materials. This included modifying language and  
437 omitting one previously produced module entirely. We see this flexibility as a strength of the tutorial  
438 format. Unlike textbook and other static material, the instructor is free to modify these tutorials to meet  
439 their needs.

440

## 441 **Impact on broader student learning and NNES students**

442 One major strength of explicit science process skill instruction is the enhanced student learning in other  
443 facets of undergraduate biology education, including content retention (Kitchen *et al.*, 2003; Dirks &  
444 Cunningham, 2006; Ward *et al.*, 2014). Unfortunately, in this study, we were not able to reliably assess  
445 the tutorial's impact on student learning other than specific gains in science process skills. We look  
446 forward to extending our assessment to other facets of student learning. Similarly, based on our design  
447 decisions, student feedback during usability testing, and assessment trends, we suspect that the  
448 tutorials are especially helpful for NNES students. Better support for this idea, would require a more  
449 targeted intervention involving larger numbers of NNES students. As modern biology deepens its  
450 international connections and international students continue to enroll at English speaking universities,  
451 we hope that the online tutorial format will provide a strong instructional tool to help minimize gaps  
452 between native English speaking and NNES students.

453

## 454 **Supplemental Material**

455 Supplement 1: Principles of Multimedia design

456 Supplement 2: Tutorial Learning Objectives

457 Supplement 3: Usability testing results

458 Supplement 4: Assessment questions

459 Supplement 5: Descriptive statistics for individual assessment questions

460

## 461 **Accessing the Tutorials**

462 All seven of our tutorial modules can be accessed in HTML5 format at  
463 (<https://sites.google.com/umn.edu/btltutorials>). For LMS-compatible files or to discuss modifying  
464 modules for your use, please contact the authors.

## 465 **Acknowledgments**

466 Dalay Olson and Max Kramer were supported by the University of Minnesota International Student  
467 Academic Services Fee and the Howard Hughes Medical Institute. We would like to thank Deena  
468 Wassenberg, Robin Wright, Annika Moe, Sadie Hebert, Jessamina Blum and Mark Decker for their input  
469 and support. We would also like to acknowledge the Understanding Science website (University of  
470 California Museum of Paleontology, <http://undsci.berkeley.edu>) for their science process skill diagram.

471

## 472 **References**

- 473 AAAS, A. A. f. t. A. o. S. (2009). *Vision and change in undergraduate biology education a call to action*.  
474 Retrieved from Washington, DC:
- 475 Abdel, C. (2002). Academic Success and the International Student: Research and Recommendations.  
476 *New Directions For Higher Education*(177), 10.
- 477 Bass, K., Dritis-Esser, D., & Stark, L. A. (2016). A primer for developing measures of science content  
478 knowledge for small-scale research and instructional use. *CBE Life Sci Educ*, 15, 14.
- 479 Bloom, B. S., Engelhart, M. D., Furst, E. J., Hill, W. H., & Krathwohl, D. R. (1956). *Taxonomy of educational*  
480 *objectives: The classification of educational goals*. New York, NY: David McKay Company.
- 481 Blummer, B. A., & Kritskaya, O. (2009). Best Practices for Creating an Online Tutorial: A Literature  
482 Review. *Journal of Web Librarianship*, 3(3), 199-216. doi:10.1080/19322900903050799
- 483 Brownell, S., Hekmat-Safe, D., Singla, V., Seawell, P., Imam, J., Eddy, S. L., . . . Cyert, M. (2015). A high-  
484 enrollment course-based undergraduate research experience improves student conceptions of  
485 scientific thinking and ability to interpret data. *CBE Life Sci Educ*, 14, 14.
- 486 Buchwitz, B. J., Beyer, C. H., Peterson, J. E., Pitre, E., Lalic, N., Sampson, P. D., & Wakimoto, B. T. (2012).  
487 Facilitating long-term changes in student approaches to learning science. *CBE Life Sci Educ*,  
488 11(3), 273-282. doi:10.1187/cbe.12-01-0011
- 489 Burns, J., Okey, J., & Wise, K. (1985). Development of an integrated process skill test: TIPS II. *Journal of*  
490 *Research in Science Teaching*, 22(2), 9.
- 491 Carpi, A. (2001). Improvements in Undergraduate Science Education Using Web-Based Instructional  
492 Modules: The Natural Science Pages. *Journal Chemical Education*, 78(12), 4.
- 493 Carpi, A., & Mikhailova, Y. (2003). Visionlearning Project. Evaluating the Design and Effectiveness of  
494 Interdisciplinary Science. *Journal of College Science Teaching*, 33(1), 4.
- 495 Chudler, E. H., & Bergsman, K. C. (2014). Explain the brain: websites to help scientists teach  
496 neuroscience to the general public. *CBE Life Sci Educ*, 13(4), 577-583. doi:10.1187/cbe.14-08-  
497 0136
- 498 Coil, D., Wenderoth, M. P., Cunningham, M., & Dirks, C. (2010). Teaching the process of science: faculty  
499 perceptions and an effective methodology. *CBE Life Sci Educ*, 9(4), 524-535. doi:10.1187/cbe.10-  
500 01-0005
- 501 Crowe, A., Dirks, C., & Wenderoth, M. P. (2008). Biology in bloom: implementing Bloom's Taxonomy to  
502 enhance student learning in biology. *CBE Life Sci Educ*, 7(4), 368-381. doi:10.1187/cbe.08-05-  
503 0024
- 504 DebBurman, S. K. (2002). Learning how scientists work: experiential research projects to promote cell  
505 biology learning and scientific process skills. *Cell Biol Educ*, 1(4), 154-172. doi:10.1187/cbe.02-  
506 07-0024

- 507 Dirks, C., & Cunningham, M. (2006). Enhancing diversity in science: is teaching science process skills the  
508 answer? *CBE Life Sci Educ*, 5(3), 218-226. doi:10.1187/cbe.05-10-0121
- 509 Domagk, S., Schwartz, R. N., & Plass, J. L. (2010). Interactivity in multimedia learning: An integrated  
510 model. *Computers in Human Behavior*, 26(5), 1024-1033. doi:10.1016/j.chb.2010.03.003
- 511 Evans, C., & Gibbons, N. J. (2007). The interactivity effect in multimedia learning. *Computers &  
512 Education*, 49(4), 1147-1160. doi:10.1016/j.compedu.2006.01.008
- 513 Freeman, S., Eddy, S. L., McDonough, M., Smith, M. K., Okoroafor, N., Jordt, H., & Wenderoth, M. P.  
514 (2014). Active learning increases student performance in science, engineering, and  
515 mathematics. *Proceedings of the National Academy of Sciences of the United States of America*,  
516 111(23), 8410-8415. doi:10.1073/pnas.1319030111
- 517 Goff, E. E., Reindl, K. M., Johnson, C., McClean, P., Offerdahl, E. G., Schroeder, N. L., & White, A. R.  
518 (2017). Efficacy of a Meiosis Learning Module Developed for the Virtual Cell Animation  
519 Collection. *CBE Life Sci Educ*, 16(1). doi:10.1187/cbe.16-03-0141
- 520 Gottesman, A. J., & Hoskins, S. G. (2013). CREATE cornerstone: introduction to scientific thinking, a new  
521 course for STEM-interested freshmen, demystifies scientific thinking through analysis of  
522 scientific literature. *CBE Life Sci Educ*, 12(1), 59-72. doi:10.1187/cbe.12-11-0201
- 523 Guo, P. J., Kim, J., & Rubin, R. (2014). How video production affects student engagement. 41-50.  
524 doi:10.1145/2556325.2566239
- 525 Hoskins, S. G., Lopatto, D., & Stevens, L. M. (2011). The C.R.E.A.T.E. approach to primary literature shifts  
526 undergraduates' self-assessed ability to read and analyze journal articles, attitudes about  
527 science, and epistemological beliefs. *CBE Life Sci Educ*, 10(4), 368-378. doi:10.1187/cbe.11-03-  
528 0027
- 529 Hoskins, S. G., Stevens, L. M., & Nehm, R. H. (2007). Selective use of the primary literature transforms  
530 the classroom into a virtual laboratory. *Genetics*, 176(3), 1381-1389.  
531 doi:10.1534/genetics.107.071183
- 532 Kazeni, M. M. M. (2005). *Development and Validation of a Test of Integrated Science Process Skills for  
533 the Further Education and Training Learners. (Unpublished master's thesis)*. University of  
534 Pretoria, Pretoria, South Africa.
- 535 Kenyon, K. L., Onorato, M. E., Gottesman, A. J., Hoque, J., & Hoskins, S. G. (2016). Testing CREATE at  
536 Community Colleges: An Examination of Faculty Perspectives and Diverse Student Gains. *CBE  
537 Life Sci Educ*, 15(1), ar8. doi:10.1187/cbe.15-07-0146
- 538 Kitchen, E., Bell, J. D., Reeve, S., Sudweeks, R. R., & Bradshaw, W. S. (2003). Teaching cell biology in the  
539 large-enrollment classroom: methods to promote analytical thinking and assessment of their  
540 effectiveness. *Cell Biol Educ*, 2(3), 180-194. doi:10.1187/cbe.02-11-0055
- 541 Krajcik, J., & Sutherland, L. (2010). Supporting students in developing scientific literacy. *Nature*, 328, 5.



- 542 Martin, B. E., & Brouwer, W. (1991). The Sharing of Personal Science and the Narrative Element in  
543 Science-Education. *Science Education*, 75(6), 707-722. doi:DOI 10.1002/sce.3730750610
- 544 Mayer, R. E. (2008). Applying the Science of Learning: Evidence-Based Principles for the Design of  
545 Multimedia Instruction. *American Psychologist*, 63(8), 760-769. doi:Doi 10.1037/0003-  
546 066x.63.8.760
- 547 Mayer, R. E., & Moreno, R. (2003). Nine Ways to Reduce Cognitive Load in Multimedia Learning.  
548 *Educational Psychologist*, 38(1), 9.
- 549 McClean, P., Johnson, C., Rogers, R., Daniels, L., Reber, J., Slator, B. M., . . . White, A. (2005). Molecular  
550 and cellular biology animations: development and impact on student learning. *Cell Biol Educ*,  
551 4(2), 169-179. doi:10.1187/cbe.04-07-0047
- 552 Moreno, R. (2004). Decreasing cognitive load for novice students: Effects of explanatory versus  
553 corrective feedback in discovery-based multimedia. *Instructional Science*, 32(1-2), 99-113.  
554 doi:DOI 10.1023/B:TRUC.0000021811.66966.1d
- 555 Narciss, S. (2004). The impact of informative tutoring feedback and self-efficacy on motivation and  
556 achievement in concept learning. *Experimental Psychology*, 51(3), 214-228. doi:10.1027/1618-  
557 3169.51.3.214
- 558 Scheiter, K., Gerjets, P., Huk, T., Imhof, B., & Kammerer, Y. (2009). The effects of realism in learning with  
559 dynamic visualizations. *Learning and Instruction*, 19(6), 481-494.  
560 doi:10.1016/j.learninstruc.2008.08.001
- 561 Segura-Totten, M., & Dalman, N. E. (2013). The CREATE Method Does Not Result in Greater Gains in  
562 Critical Thinking than a More Traditional Method of Analyzing the Primary Literature. *J Microbiol*  
563 *Biol Educ*, 14(2), 166-175. doi:10.1128/jmbe.v14i2.506
- 564 Shi, J., Power, J., & Klymkowsky, M. (2011). Revealing Student Thinking about Experimental Design and  
565 the Roles of Control Experiments. *International Journal for the Scholarship of Teaching and*  
566 *Learning*, 5(2). doi:10.20429/ijstl.2011.050208
- 567 Silver, S. L., & Nickel, L. T. (2005). Are online tutorials effective? A comparison of online and classroom  
568 library instruction methods. *Research Strategies*, 20(4), 389-396.  
569 doi:10.1016/j.resstr.2006.12.012
- 570 Stevens, L. M., & Hoskins, S. G. (2014). The CREATE Strategy for Intensive Analysis of Primary Literature  
571 Can Be Used Effectively by Newly Trained Faculty to Produce Multiple Gains in Diverse Students.  
572 *CBE Life Sci Educ*, 13(2), 224-242. doi:10.1187/cbe.13-12-0239
- 573 Türkay, S. (2016). The effects of whiteboard animations on retention and subjective experiences when  
574 learning advanced physics topics. *Computers & Education*, 98, 102-114.  
575 doi:10.1016/j.compedu.2016.03.004
- 576 Ward, J. R., Clarke, H. D., & Horton, J. L. (2014). Effects of a research-infused botanical curriculum on  
577 undergraduates' content knowledge, STEM competencies, and attitudes toward plant sciences.  
578 *CBE Life Sci Educ*, 13(3), 387-396. doi:10.1187/cbe.13-12-0231

579 Wiggins, G., & McTighe, J. (2005). *Understanding by Design (Expanded 2nd ed.)* Alexandria, VA:  
580 Association for Supervision and Curriculum Development.

581 Woodham, H., Marbach-Ad, G., Downey, G., Tomei, E., & Thompson, K. (2016). Enhancing Scientific  
582 Literacy in the Undergraduate Cell Biology Laboratory Classroom. *J Microbiol Biol Educ*, *17*(3),  
583 458-465. doi:10.1128/jmbe.v17i3.1162

584 Wright, R., & Klymkowsky, M. (2005). Points of view: content versus process: is this a fair choice? *CBE*  
585 *Life Sci Educ*, *4*, 10.

586

587

## 588 **Figure Legends**

589 **Figure 1: Example screenshots from ‘Experimental Design’ interactive tutorial.** Interactive tutorials  
590 were designed using consistently formatted interactions. These included module introductions (A),  
591 challenge questions (B), and specific feedback (C). Tutorials also include test tube graphics that allow  
592 students to track their progress through each module, review individual learning objectives (D), review  
593 entire modules (E) and review their progress through the entire tutorial (F). The test tube rack  
594 containing test tubes for all completed modules is accessible at any time during the tutorial by clicking  
595 on the small rack icon in upper right corner of the tutorial interface. This allows students easy access to  
596 review past content and track progress.

597

598 **Figure 2: Experimental design.** Students enrolled in parallel sections of the same introductory biology  
599 course were given two weeks to complete either the online tutorials or textbook reading. At the end of  
600 the two weeks, a 15 question quiz assessed students’ science process skills.

601

602 **Figure 3: Mean scores for science process skills assessment after textbook (red) or online tutorial**  
603 **(purple) assignment.** Comparison highlights difference between instructional approaches for native and  
604 non-native English speakers.

605

606 **Figure 4: Mean scores for science process skills assessment among native and non-native English**  
607 **speakers.** Comparison highlights the difference between the two groups when given textbook reading or  
608 online tutorials.

609

610

611

612

| <b>Regression Results: TIPS II Scores</b> |                  |
|-------------------------------------------|------------------|
| <b>Cumulative GPA</b>                     | 1.133** (.405)   |
| <b>Online tutorial group</b>              | 0.824* (.317)    |
| <b>NNES status</b>                        | -0.552 (.474)    |
| <b>Constant</b>                           | 7.374*** (1.352) |
| <b>N</b>                                  | 151              |
| <b>Adjusted R<sup>2</sup></b>             | 0.14             |
| <b>F Test</b>                             | 7.146***         |

**Table 1** Ordinary least squares regression, with TIPS II score as dependent variable. Cell entries are unstandardized beta coefficients with standard errors in parentheses. \*p < .05, \*\*p < .01, \*\*\*p < .001

A

Submit a bug

## DESIGN AN EXPERIMENT

### DRAMATIC DISCOVERIES: ULCERS & H.PYLORI

CURRENTLY THEORIES... (ALTHOUGH NOT PROVEN)

SPICY! ACIDIC H.PYLORI MODEL ORGANISMS

DR. ROBIN WARREN DR. BARRY MARSHALL

(Video length: 1 minute)

CLICK HERE TO START!

BEGIN

B

Submit a bug

## DESIGN AN EXPERIMENT

Select the **BEST** Experimental Treatment for your experiments

Water + H. Pylori Soda Water Water Soda Water + H. Pylori

Hover over for more information!

Submit

Each tube represents a possible treatment we can give our **EXPERIMENTAL** mice. Remember, the experimental mice are the mice we hypothesize will develop ulcers when treated.

OK!

bioRxiv preprint doi: <https://doi.org/10.1101/153015>; this version posted June 22, 2017. The copyright holder for this preprint (which was not certified by peer review) is the author/funder, who has granted bioRxiv a license to display the preprint in perpetuity. It is made available under aCC-BY-NC-ND 4.0 International license.

C

Submit a bug

Soda water is acidic and this sample may induce the formation of ulcers. The problem is using this sample does not align with your hypothesis.

Remember, you are testing the effects of *H. pylori* and its ability to induce the formation of ulcers in mice.

Go back and select a sample that better aligns with your hypothesis.

TRY AGAIN

EXPERIMENTAL mice. Remember, the experimental mice are the mice we hypothesize will develop ulcers when treated.

D

Submit a bug

## Design an Experiment:

### Learning Objective 3 Completed!

**SUMMARY: Include Controls**

Scientific controls are a **treatment group** to which you compare your experimental group. Ideally, this group differs from the experimental group by only one **variable**.

*In this case that variable is H. pylori.*

In your studies, giving water to your mice as a control allows you to "control" for the effect of *H. pylori* on ulcer formation.

NEXT

E

Submit a bug

## THE SCIENTIFIC PROCESS:

### COLLECT & ORGANIZE DATA

Gather, represent and interpret data that...

Uses basic statistics

Correctly labels graph Axes and includes units

Uses appropriate graphs to display data

Averages replicates

Is presented in graphs and tables

BACK

F

Submit a bug

## THE SCIENTIFIC PROCESS:

### TUTORIAL REVIEW

Primary Literature

Testable Questions

Hypotheses

Experimental Design

Collect & Organize Data

Analysis & Conclusions

Communicate & Discuss

Benefits & Outcomes

**“Online Tutorials” group**  
class section 1  
n=98 students

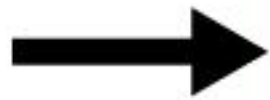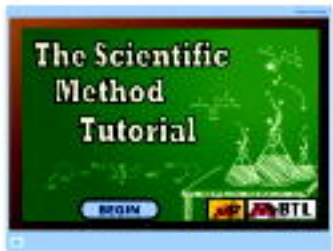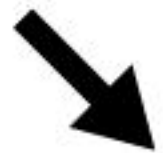

**“Textbook Reading” group**  
class section 2  
n=112 students

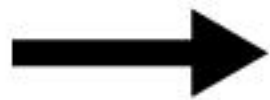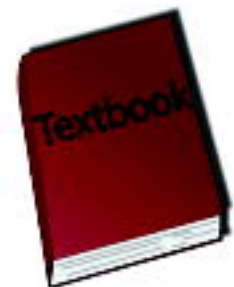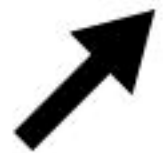

**Science Process Skills  
assessment**

## Online tutorials help all students, but especially NNES students

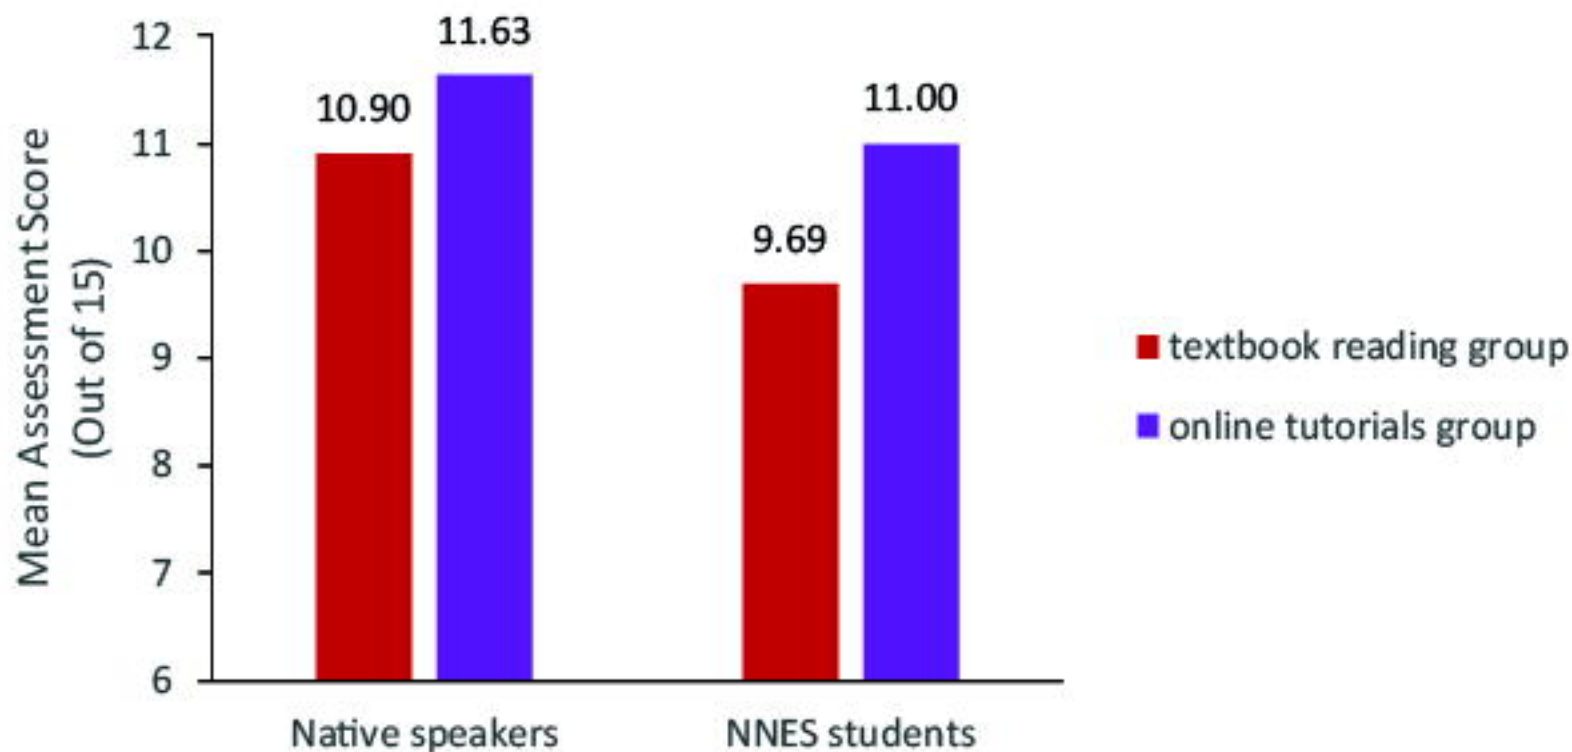

## Online Tutorials help NNES students 'catch up' to native English speakers

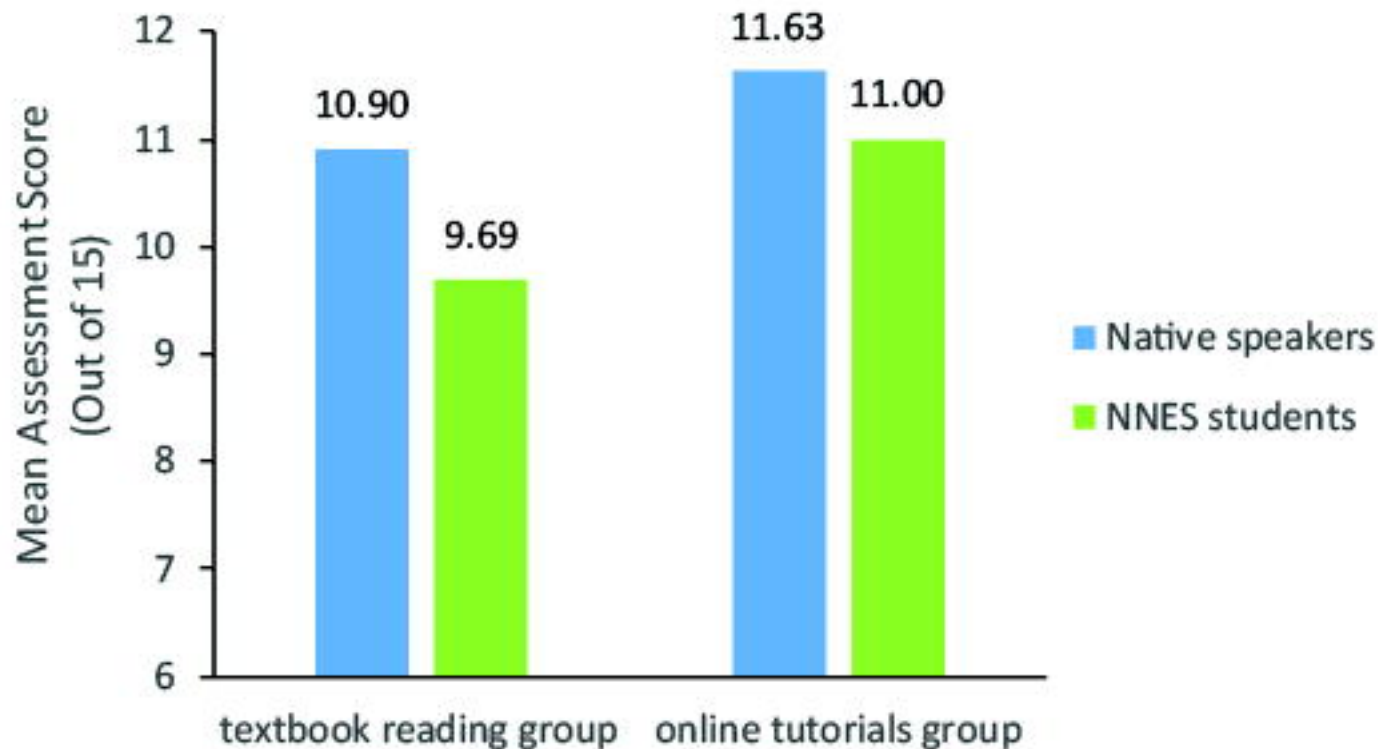

Source: http://biorxiv.org/content/10.1101/153015v1.full.pdf
